# Supplementary material for: Metabolomics Comparison of Drug-Resistant and Drug-Susceptible Pseudomonas aeruginosa Strain (Intra- and Extracellular Analysis)
Source: MDPI journal article supplement (doi:10.3390/ijms221910820), 2021-10-06
Supplement: s1 [file s1]

## Supporting information

**Table S1.** <sup>1</sup>H NMR signal assignments for intracellular metabolites.

| L.p. | Metabolites       | KEGG number | Chemical shift [ppm] |
|------|-------------------|-------------|----------------------|
| 1.   | 5-aminopentanoate | C00431      | 2.20 (t)             |
| 2.   | Acetate           | C00033      | 1.90 (s)             |
| 3.   | Adenine           | C00147      | 8.20 (d)             |
| 4.   | Alanine           | C00133      | 1.50 (d)             |
| 5.   | AMP               | C00360      | 8.60 (s)             |
| 6.   | Aspartate         | C00049      | 2.70 (dd)            |
| 7.   | Betaine           | C00719      | 3.30 (s)             |
| 8.   | Ethanol           | C00469      | 1.20 (t)             |
| 9.   | Formate           | C00058      | 8.40 (s)             |
| 10.  | Glucose           | C00031      | 5.20 (d)             |
| 11.  | Glutamate         | C00025      | 2.30 (m)             |
| 12.  | Glycine           | C00037      | 3.60 (s)             |
| 13.  | Histamine         | C00263      | 7.10 (s)             |
| 14.  | Histidine         | C00135      | 7.90 (s)             |
| 15.  | Homoserine        | C00065      | 2.00 (m)             |
| 16.  | Isobutyrate       | C06001      | 1.10 (d)             |
| 17.  | Isocitrate        | C00311      | 2.60 (m)             |
| 18.  | Isoleucine        | C00407      | 1.00 (d)             |
| 19.  | Lactate           | C00256      | 1.30 (d)             |
| 20.  | Leucine           | C00123      | 0.90 (t)             |
| 21.  | Methionine        | C00073      | 2.10 (s)             |
| 22.  | NAD <sup>+</sup>  | C00003      | 9.30 (s)             |
| 23.  | Oxypurinol        | C07599      | 8.20 (s)             |
| 24.  | Phenylalanine     | C00079      | 7.40 (t)             |
| 25.  | Pyruvate          | C00022      | 2.40 (s)             |
| 26.  | Sarcosine         | C00213      | 2.70 (s)             |
| 27.  | Succinate         | C00042      | 2.40 (s)             |
| 28.  | Threonine         | C00188      | 3.60 (d)             |
| 29.  | Tyrosine          | C00082      | 7.20 (d)             |
| 30.  | UMP               | C00105      | 8.10 (m)             |
| 31.  | Uracil            | C00106      | 5.80 (d)             |
| 32.  | Valine            | C00183      | 1.00 (d)             |

**Table S2.** <sup>1</sup>H NMR signal assignments for extracellular metabolites.

| L.p. | Metabolites         | KEGG number | Chemical shift [ppm] |
|------|---------------------|-------------|----------------------|
| 1.   | 6-Hydroxynicotinate | C01020      | 8.10 (m)             |
| 2.   | Acetate             | C00033      | 1.90 (s)             |
| 3.   | Alanine             | C00133      | 1.50 (d)             |
| 4.   | Betaine             | C00719      | 3.30 (s)             |
| 5.   | Formate             | C00058      | 8.40 (s)             |
| 6.   | Glycine             | C00037      | 3.60 (s)             |
| 7.   | Histamine           | C00263      | 8.00 (s)             |
| 8.   | Histidine           | C00135      | 8.05 (s)             |
| 9.   | Imidazole           | C05568      | 8.20 (s)             |
| 10.  | Isobutyrate         | C06001      | 1.10 (d)             |
| 11.  | Isoleucine          | C00407      | 1.00 (d)             |
| 12.  | Leucine             | C00123      | 0.95 (t)             |
| 13.  | Lysine              | C00047      | 1.70 (m)             |
| 14.  | Methanol            | C00132      | 3.40 (s)             |
| 15.  | Methionine          | C00073      | 2.10 (s)             |
| 16.  | Oxypurinol          | C07599      | 8.25 (s)             |
| 17.  | Phenylalanine       | C00079      | 7.40 (m)             |
| 18.  | Pyruvate            | C00022      | 2.40 (s)             |
| 19.  | Threonine           | C00188      | 3.60 (d)             |
| 20.  | Trehalose           | C00689      | 5.20 (d)             |
| 21.  | Tryptophan          | C00078      | 7.70 (d)             |
| 22.  | Tyrosine            | C00082      | 6.90 (dd)            |
| 23.  | Valine              | C00183      | 1.05 (d)             |
| 24.  | Glutamate           | C00025      | 2.28 (m)             |
| 25.  | Aspartate           | C00049      | 2.82 (dd)            |
| 26.  | Asparagine          | C00152      | 2.99 (dd)            |
| 27.  | Pyroglutamate       | C01879      | 2.45 (m)             |

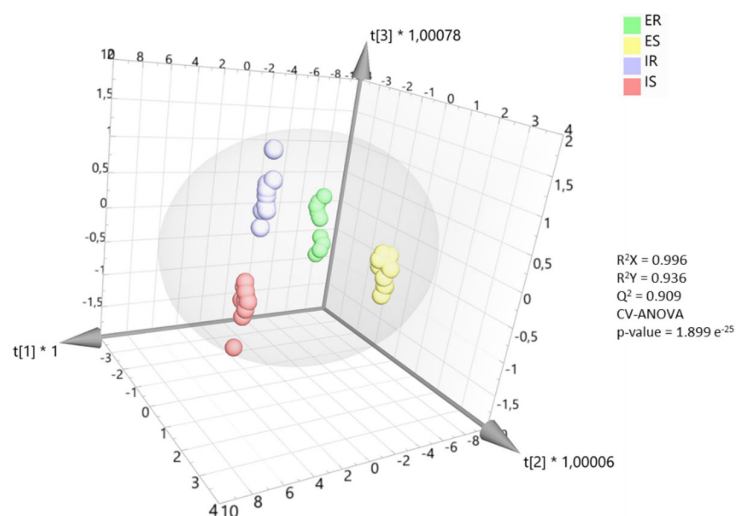

**Figure S1.** OPLS-DA score plot of  $^1\text{H}$  NMR data of *P. aeruginosa* strains. (drug-resistance extracellular (green), drug-susceptible extracellular (yellow), drug-resistance intracellular (blue), drug-susceptible intracellular (red)).

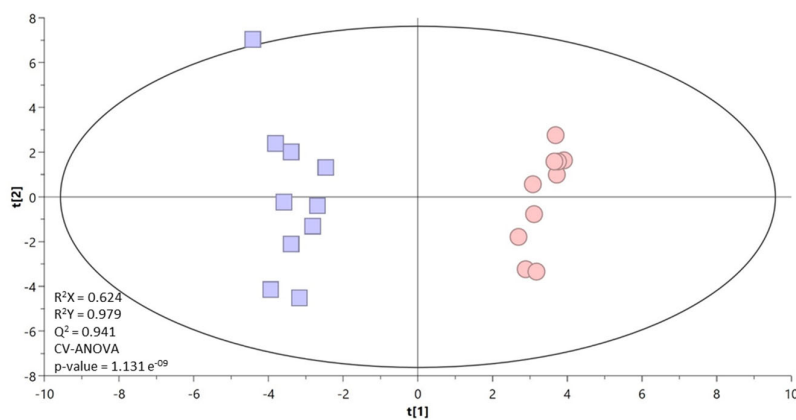

**Figure S2.** OPLS-DA score plot of  $^1\text{H}$  NMR data of intracellular metabolites of drug-resistance (blue squares) and drug-susceptible (red circle) *P. aeruginosa* strains.

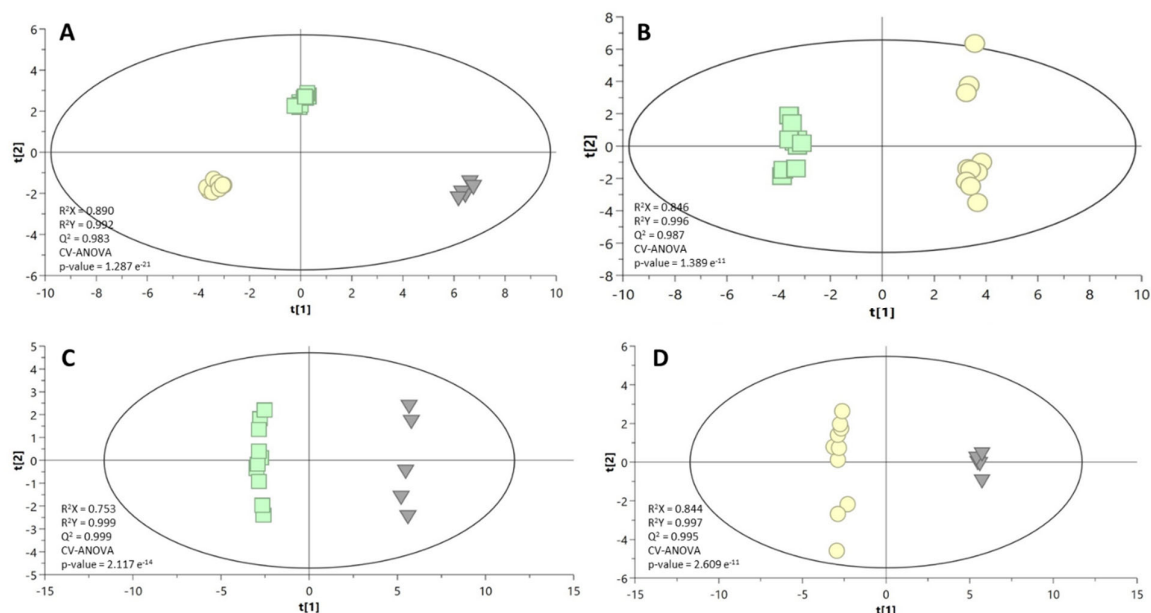

**Figure S3.** OPLS-DA models for  $^1\text{H}$  NMR data of extracellular metabolites of *P. aeruginosa* strains. (A) both *P. aeruginosa* strains with control; (B) both *P. aeruginosa* strains; (C) drug-resistance *P. aeruginosa* strain with control; (D) drug-susceptible *P. aeruginosa* strain with control. (drug-resistance extracellular (green squares), drug-susceptible extracellular (yellow circle), control – LB medium (gray triangles))

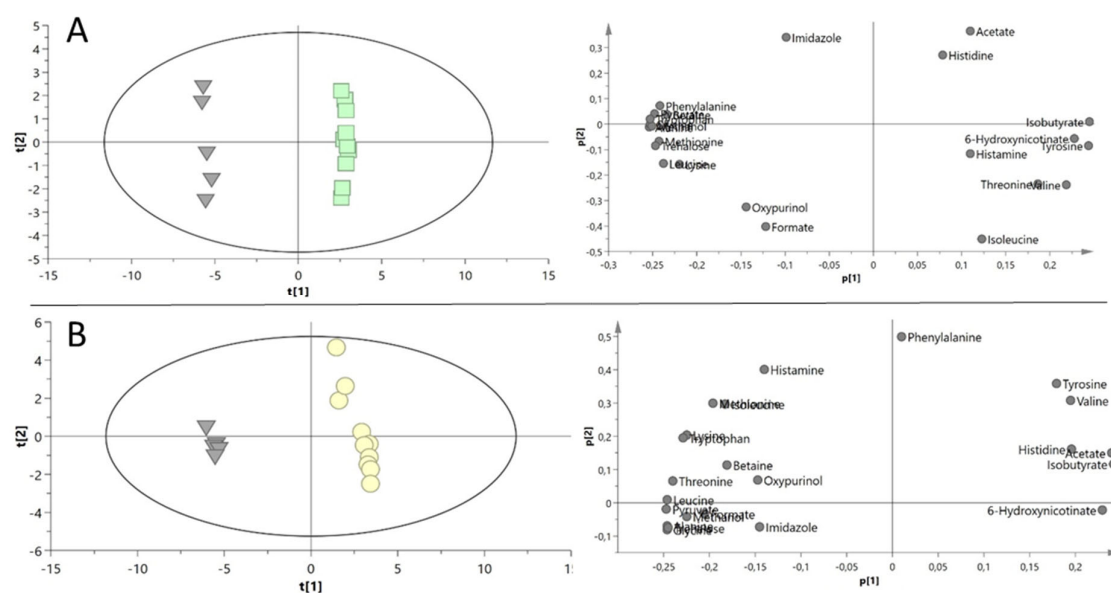

**Fig S4.** PCA model plots and corresponding loading plot for  $^1\text{H}$  NMR data of extracellular metabolites of *P. aeruginosa* strains. (A) drug-resistance *P. aeruginosa* strain with control (the first and second principal component (PC) accounted respectively for 67.6 % and 11.8 % of the total variance in the data ( $R^2X = 0.864$ , three PC's)); (B) drug-susceptible *P. aeruginosa* strain with control (the first and second principal component (PC) accounted respectively for 69.9 % and 14.5 % of the total variance in the data ( $R^2X = 0.845$ , two PC's)). (drug-resistance extracellular (green squares), drug-susceptible extracellular (yellow circle), control – LB medium (gray triangles))
